# Supplementary material for: The Impact of Early-Phase Trial Design in the Drug Development Process
Source: Oxford University Press journal article supplement (doi:10.1158/1078-0432.ccr-18-0203), 2018-10-16

## Supplemental Table S1. Parameters for generating toxicity, response and median survival profiles for a population of agents

| Matching agents entering the pipeline from 1993-2004 (section 2.6) | | | |
| --- | --- | --- | --- |
| Parameter  β | Toxicity  Unif(0, 0.22) | Response rate  Unif(0.10, 0.15) | Median Survival  Unif(6.00, 6.25) |
| α | Unif(β, 0.50) | Unif(0.15, 0.40) | Unif(6.25, 18.0) |
| κ | Unif(1.0, 2.0) | Unif(0, 1.5) | Unif(0, 3.0) |
| A population of low toxicity agents (section 2.7) | | | |
| Parameter  β | Toxicity  Unif(0, 0.10) | Response rate  Unif(0.10, 0.15) | Median Survival  Unif(6.00, 6.25) |
| α | Unif(β, 0.40) | Unif(0.15, 0.40) | Unif(6.25, 18.0) |
| κ | Unif(1, 2.0) | Unif(0, 1.5) | Unif(0, 3.0) |

## Supplementary Figure S1. 100 randomly selected drug profiles, A: toxicity; B: response rate; C: median survival for the population that matches agents entering the pipeline from 1993-2004 (section 2.6)

| A. Toxicity Profiles |
| --- |
|  |
| B. Objective Response Rate (ORR) Profiles |
|  |
| C. Median Survival Profiles |
|  |
|  |

**Supplementary Figure S2. Plot of 100 randomly selected toxicity, reponse and median survival profiles for 4, 6 or 8 doses levels to be tested in the phase I trial (section 2.6)**

## Supplemental Table S2. Proportion of drugs with two successful phase III trials among 17225 drugs with a phase I trial that has at least one safe dose, defined as a toxicity probability less than or equal to 20% (section 3.2)

| Two successful phase III trials | | | | | | | |
| --- | --- | --- | --- | --- | --- | --- | --- |
|  |  | Phase II n=(10,19)  Phase III n=296 | | | Phase II n=(18,25)  Phase III n=296 | | |
| Median Survival  (M) | # of  drugs | 3+3 | BOIN | CRM | 3+3 | BOIN | CRM |
| 6.0- 7.0 | 3641 | 1.0 | 1.1 | 1.2 | 1.3 | 1.5 | 1.5 |
| 7.0- 8.0 | 2994 | 3.5 | 3.9 | 4.4 | 4.3 | 4.9 | 5.1 |
| 8.0- 9.0 | 2537 | 9.2 | 10.3 | 10.8 | 11.7 | 12.6 | 13.4 |
| 9.0-10.0 | 2048 | 15.3 | 17.0 | 18.1 | 18.5 | 21.3 | 21.6 |
| 10.0-11.0 | 1629 | 20.9 | 22.7 | 24.1 | 25.4 | 28.6 | 29.1 |
| 11.0-12.0 | 1240 | 25.9 | 29.3 | 30.1 | 32.5 | 36.1 | 36.9 |
| 12.0-13.0 | 782 | 31.9 | 34.0 | 36.3 | 39.0 | 42.4 | 44.1 |
| 13.0-14.0 | 604 | 35.0 | 38.1 | 40.7 | 43.8 | 47.2 | 48.0 |
| 14.0-15.0 | 514 | 37.3 | 40.9 | 42.8 | 46.6 | 49.8 | 53.0 |
| > 15 | 1236 | 41.4 | 45.4 | 46.5 | 50.4 | 54.6 | 56.4 |
|  |  | Phase II n=(10,19)  Phase III n=498 | | | Phase II n=(18,25)  Phase III n=498 | | |
| Median Survival  (M) | # of  drugs | 3+3 | BOIN | CRM | 3+3 | BOIN | CRM |
| 6.0- 7.0 | 3641 | 1.3 | 1.4 | 1.4 | 1.6 | 1.7 | 1.9 |
| 7.0- 8.0 | 2994 | 6.2 | 6.6 | 7.0 | 7.4 | 8.4 | 8.6 |
| 8.0- 9.0 | 2537 | 14.1 | 15.5 | 16.6 | 17.3 | 19.7 | 20.2 |
| 9.0-10.0 | 2048 | 19.0 | 21.7 | 22.1 | 23.7 | 26.6 | 27.8 |
| 10.0-11.0 | 1629 | 23.2 | 25.5 | 26.0 | 28.4 | 32.1 | 32.9 |
| 11.0-12.0 | 1240 | 27.2 | 30.4 | 31.5 | 34.1 | 38.5 | 39.8 |
| 12.0-13.0 | 782 | 34.0 | 36.6 | 38.3 | 40.9 | 45.3 | 46.4 |
| 13.0-14.0 | 604 | 36.2 | 39.8 | 41.3 | 43.8 | 48.2 | 50.2 |
| 14.0-15.0 | 514 | 39.0 | 42.6 | 43.5 | 47.4 | 51.2 | 54.4 |
| > 15 | 1236 | 42.2 | 46.3 | 47.4 | 51.4 | 55.6 | 57.8 |

## Supplemental Table S3.. Proportion of drugs with two successful phase III trials among 20000 drugs in the ‘low toxicity’ population (section 3.3)

| Two successful phase III trials | | | | | | | |
| --- | --- | --- | --- | --- | --- | --- | --- |
|  |  | Phase II n=(10,19)  Phase III n=296 | | | Phase II n=(18,25)  Phase III n=296 | | |
| Median Survival  (M) | # of  drugs | 3+3 | BOIN | CRM | 3+3 | BOIN | CRM |
| 6.0- 7.0 | 1939 | 0.4 | 0.5 | 0.5 | 0.6 | 0.6 | 0.6 |
| 7.0- 8.0 | 2418 | 3.6 | 4.3 | 4.3 | 4.6 | 5.0 | 5.3 |
| 8.0- 9.0 | 2486 | 11.4 | 12.8 | 13.3 | 14.0 | 16.0 | 16.1 |
| 9.0-10.0 | 2483 | 19.6 | 21.4 | 22.3 | 24.6 | 26.6 | 28.1 |
| 10.0-11.0 | 2205 | 25.4 | 28.1 | 29.0 | 30.3 | 34.0 | 35.7 |
| 11.0-12.0 | 2152 | 28.6 | 32.3 | 33.2 | 35.7 | 39.7 | 40.4 |
| 12.0-13.0 | 1544 | 34.1 | 38.0 | 39.4 | 40.9 | 45.9 | 47.1 |
| 13.0-14.0 | 1162 | 38.3 | 42.0 | 43.7 | 47.0 | 51.4 | 52.2 |
| 14.0-15.0 | 1070 | 42.0 | 45.4 | 47.3 | 51.3 | 55.6 | 57.1 |
| > 15 | 2541 | 44.2 | 48.0 | 49.5 | 53.9 | 58.7 | 60.4 |
|  |  | Phase II n=(10,19)  Phase III n=498 | | | Phase II n=(18,25)  Phase III n=498 | | |
| Median Survival  (M) | # of  drugs | 3+3 | BOIN | CRM | 3+3 | BOIN | CRM |
| 6.0- 7.0 | 1939 | 0.9 | 1.0 | 0.9 | 1.2 | 1.3 | 1.3 |
| 7.0- 8.0 | 2418 | 8.0 | 9.2 | 9.6 | 9.9 | 11.0 | 11.7 |
| 8.0- 9.0 | 2486 | 18.9 | 21.5 | 22.1 | 23.8 | 26.4 | 26.9 |
| 9.0-10.0 | 2483 | 25.5 | 28.6 | 28.9 | 31.3 | 35.3 | 36.2 |
| 10.0-11.0 | 2205 | 27.5 | 31.3 | 32.0 | 34.6 | 38.2 | 39.3 |
| 11.0-12.0 | 2152 | 30.0 | 34.2 | 34.8 | 37.5 | 41.9 | 42.4 |
| 12.0-13.0 | 1544 | 34.9 | 39.4 | 39.6 | 43.3 | 47.9 | 49.0 |
| 13.0-14.0 | 1162 | 38.7 | 42.9 | 44.7 | 48.2 | 52.2 | 53.2 |
| 14.0-15.0 | 1070 | 42.5 | 47.0 | 48.5 | 51.9 | 56.1 | 57.7 |
| > 15 | 2541 | 45.6 | 49.0 | 50.4 | 55.2 | 59.3 | 60.4 |

## Supplemental Table S4. Proportion of drugs with two successful phase III trials using an initial phase I target of 30% (section 3.2)

| Two successful phase III trials | | | | | | | |
| --- | --- | --- | --- | --- | --- | --- | --- |
|  |  | Phase II n=(10,19)  Phase III n=296 | | | Phase II n=(18,25)  Phase III n=296 | | |
| Median Survival  (M) | # of  drugs | 3+3 | BOIN | CRM | 3+3 | BOIN | CRM |
| 6.0- 7.0 | 1837 | 0.3 | 0.5 | 0.4 | 0.3 | 0.6 | 0.6 |
| 7.0- 8.0 | 2258 | 2.3 | 3.9 | 4.1 | 2.7 | 5.0 | 5.2 |
| 8.0- 9.0 | 2360 | 7.7 | 12.7 | 13.3 | 9.1 | 15.6 | 16.1 |
| 9.0-10.0 | 2307 | 13.5 | 21.4 | 22.1 | 16.8 | 27.3 | 27.3 |
| 10.0-11.0 | 2206 | 17.6 | 28.1 | 28.7 | 21.9 | 34.1 | 35.8 |
| 11.0-12.0 | 2115 | 20.7 | 31.9 | 32.7 | 25.8 | 39.8 | 40.2 |
| 12.0-13.0 | 1619 | 24.5 | 36.8 | 38.2 | 31.4 | 45.0 | 46.5 |
| 13.0-14.0 | 1294 | 28.3 | 40.4 | 41.4 | 33.7 | 49.3 | 50.3 |
| 14.0-15.0 | 1179 | 30.6 | 43.1 | 44.1 | 36.5 | 52.9 | 54.1 |
| > 15 | 2825 | 33.3 | 46.7 | 47.3 | 40.9 | 56.4 | 57.2 |
|  |  | Phase II n=(10,19)  Phase III n=498 | | | Phase II n=(18,25)  Phase III n=498 | | |
| Median Survival  (M) | # of  drugs | 3+3 | BOIN | CRM | 3+3 | BOIN | CRM |
| 6.0- 7.0 | 1837 | 0.6 | 0.9 | 1.1 | 0.8 | 1.2 | 1.2 |
| 7.0- 8.0 | 2258 | 5.4 | 9.1 | 9.1 | 7.0 | 11.1 | 11.5 |
| 8.0- 9.0 | 2360 | 13.7 | 22.4 | 22.7 | 17.5 | 27.5 | 27.9 |
| 9.0-10.0 | 2307 | 19.4 | 30.0 | 30.0 | 24.2 | 36.4 | 36.8 |
| 10.0-11.0 | 2206 | 22.2 | 32.2 | 33.4 | 27.3 | 39.9 | 40.0 |
| 11.0-12.0 | 2115 | 24.1 | 34.0 | 34.7 | 29.4 | 42.6 | 43.0 |
| 12.0-13.0 | 1619 | 27.5 | 38.9 | 39.5 | 33.3 | 48.0 | 47.6 |
| 13.0-14.0 | 1294 | 29.8 | 42.6 | 42.8 | 36.5 | 51.9 | 52.2 |
| 14.0-15.0 | 1179 | 31.8 | 44.4 | 44.8 | 38.6 | 54.6 | 55.4 |
| > 15 | 2825 | 34.1 | 47.3 | 48.1 | 42.5 | 58.0 | 58.3 |

**Supplementary Figure S4. Plot of proportion of agents with two successful phase II trials using a target of 30% for CRM and BOIN (section 3.2)**


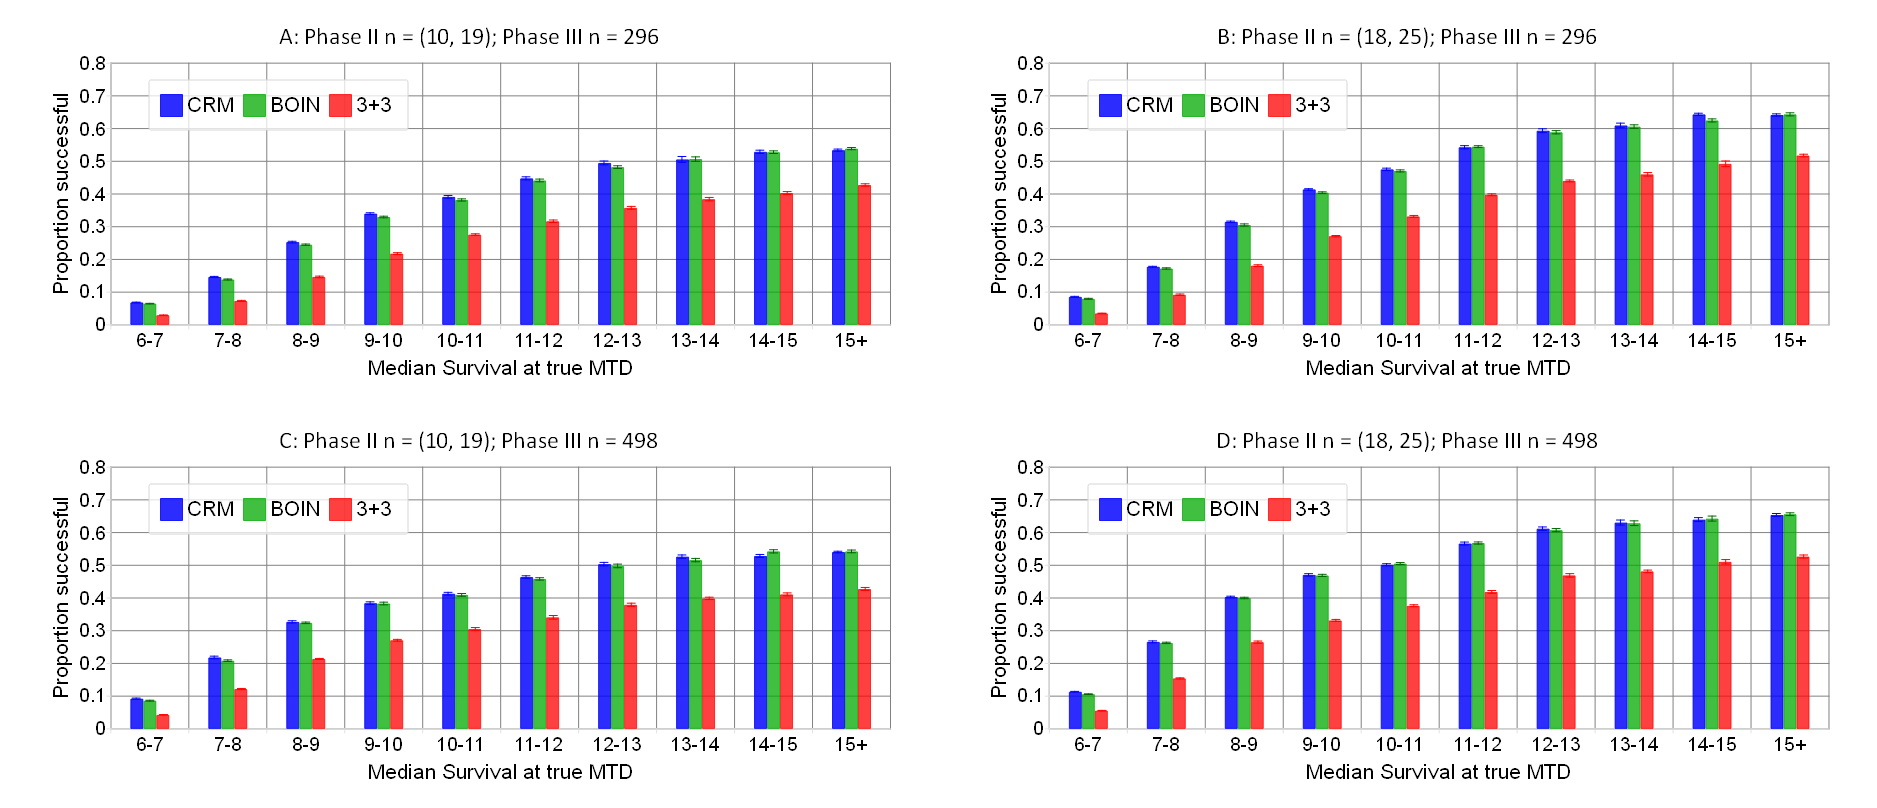

Supplement: 10780432ccr180203-sup-195695_4_supp_5075824_pg32yl.docx [file 10780432ccr180203-sup-195695_4_supp_5075824_pg32yl.docx]
